# Supplementary material
Source: publisher figshare collection journal article supplement (https://acs.figshare.com/ndownloader/files/4609897)
Supplement: Supplementary file 1 [file 4609897]

## Supporting information

### Phosphate Prodrugs Derived From N-Acetylglucosamine Have Enhanced Chondroprotective Activity in Explant Cultures and Represent a New Lead in Anti-Osteoarthritis Drug Discovery.

Christopher McGuigan<sup>a</sup> Michaela Serpi, Rita Bibbo, Helen Roberts, Clare Hughes, Bruce Caterson, Ana Torrent Gibert and Carlos Raúl Alaez Verson

#### Microanalytical data on target compounds

| Cpd       | Formula                                                                                   | Calculated %                | Found %                       |
|-----------|-------------------------------------------------------------------------------------------|-----------------------------|-------------------------------|
| <b>3a</b> | C <sub>25</sub> H <sub>33</sub> N <sub>2</sub> O <sub>11</sub> P.<br>1.5 H <sub>2</sub> O | C 50.42%, H 6.09%, N 4.70%. | C 50.73 %, H 6.42 %, N 4.79%. |
| <b>3q</b> | C <sub>26</sub> H <sub>41</sub> N <sub>2</sub> O <sub>11</sub> P                          | C 53.06%, H 7.02%, N 4.76%. | C 52.90%, H 7.09 %, N 4.54%.  |

#### Analytical reverse phase HPLC data on selected target compounds

| Cpd       | Elution conditions | tR (mins)        | $\lambda_{\text{max}}$ | Purity |
|-----------|--------------------|------------------|------------------------|--------|
| <b>3b</b> | a                  | 6.65             | 288                    | 99%    |
| <b>3c</b> | b                  | 5.76             | 278                    | 97%    |
| <b>3g</b> | c                  | 6.31, 6.63, 7.55 | 274                    | 100 %  |
| <b>3i</b> | c                  | 6.55, 7.05, 7.81 | 274                    | 96 %   |
| <b>3k</b> | c                  | 6.66, 7.40       | 273                    | 96 %   |
| <b>3m</b> | c                  | 6.85             | 273                    | 96 %   |
| <b>3n</b> | c                  | 7.35, 7.79       | 274                    | 97 %   |
| <b>3r</b> | c                  | 6.32, 7.64       | 275                    | 95 %   |

a) 85% H<sub>2</sub>O : 15% CH<sub>3</sub>CN; b) 68% H<sub>2</sub>O: 32% CH<sub>3</sub>CN;

c) 100% H<sub>2</sub>O : 0% CH<sub>3</sub>CN to 0% H<sub>2</sub>O : 100% CH<sub>3</sub>CN in 10 mins

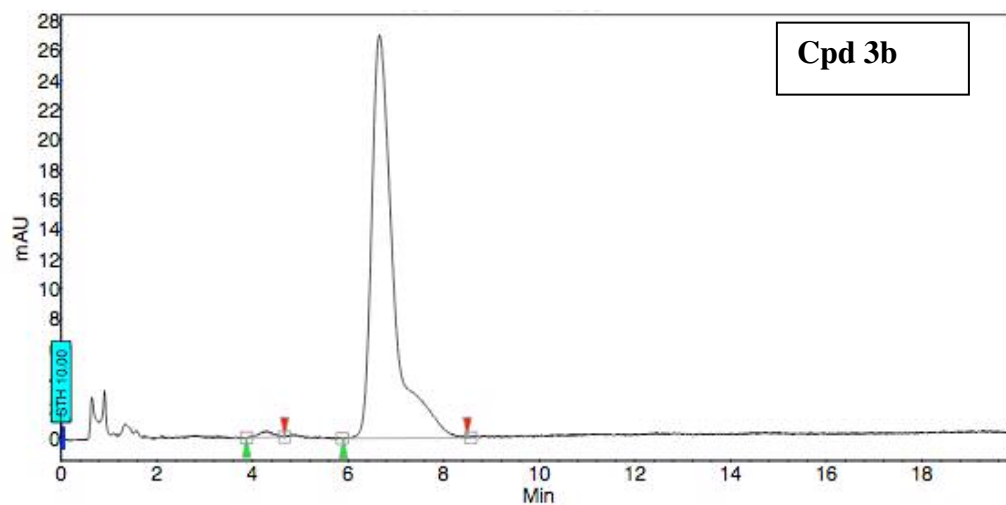

| Index | Name    | Time [Min] | Quantity [% Area] | Height [mAU] | Area [mAU.Min] | Area % [%] |
|-------|---------|------------|-------------------|--------------|----------------|------------|
| 1     | UNKNOWN | 4.29       | 1.01              | 0.4          | 0.1            | 1.007      |
| 2     | UNKNOWN | 6.65       | 98.99             | 27.0         | 14.2           | 98.993     |
| Total |         |            | 100.00            | 27.4         | 14.3           | 100.000    |

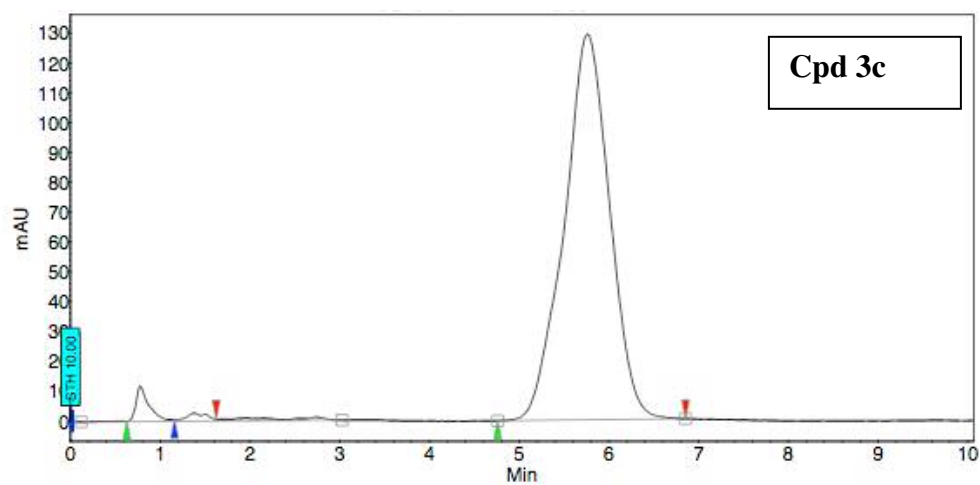

| Index | Name    | Time [Min] | Quantity [% Area] | Height [mAU] | Area [mAU.Min] | Area % [%] |
|-------|---------|------------|-------------------|--------------|----------------|------------|
| 1     | UNKNOWN | 0.77       | 2.53              | 11.9         | 2.0            | 2.533      |
| 2     | UNKNOWN | 1.37       | 0.91              | 2.6          | 0.7            | 0.915      |
| 3     | UNKNOWN | 5.76       | 96.55             | 129.3        | 75.8           | 96.552     |
| Total |         |            | 100.00            | 143.8        | 78.5           | 100.000    |

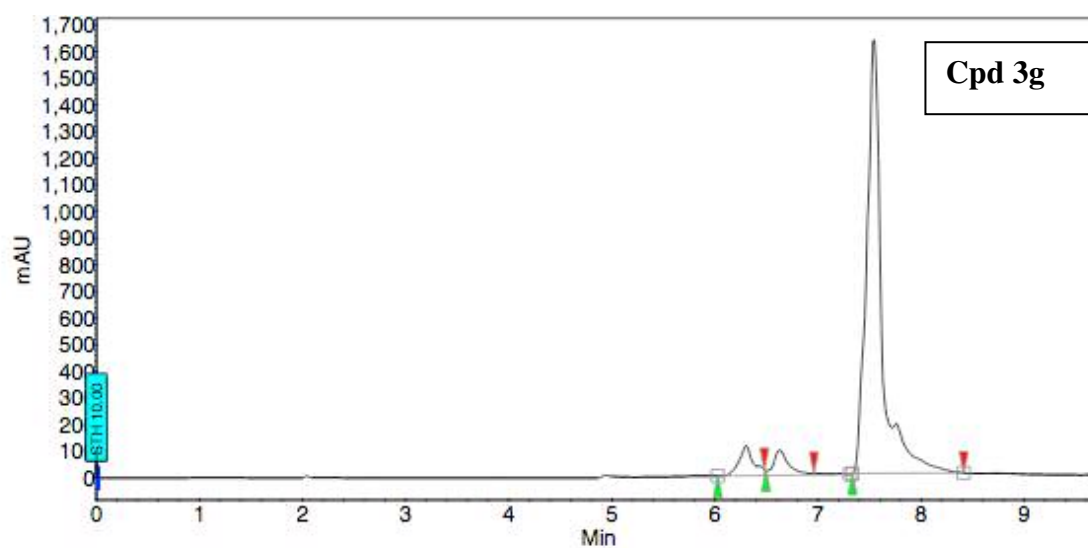

| Index | Name    | Time (Min) | Quantity (% Area) | Height (mAU) | Area (mAU.Min) | Area % (%) |
|-------|---------|------------|-------------------|--------------|----------------|------------|
| 1     | UNKNOWN | 6.31       | 5.74              | 112.6        | 18.0           | 5.739      |
| 2     | UNKNOWN | 6.63       | 5.00              | 96.6         | 15.7           | 5.001      |
| 3     | UNKNOWN | 7.55       | 89.26             | 1625.9       | 280.0          | 89.259     |
| Total |         |            | 100.00            | 1835.0       | 313.7          | 100.000    |

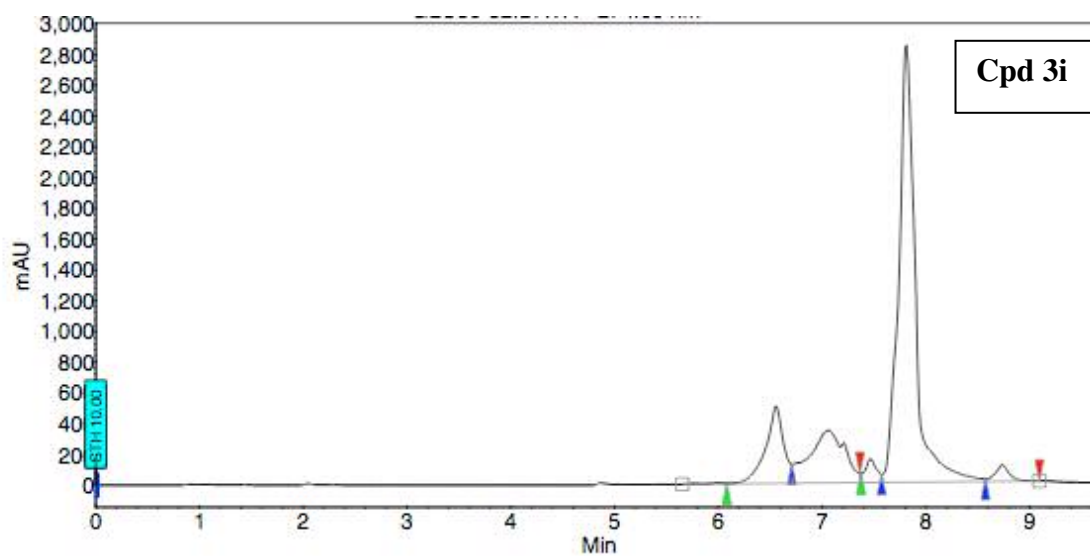

| Index | Name    | Time (Min) | Quantity (% Area) | Height (mAU) | Area (mAU.Min) | Area % (%) |
|-------|---------|------------|-------------------|--------------|----------------|------------|
| 1     | UNKNOWN | 6.56       | 12.55             | 503.1        | 100.4          | 12.545     |
| 2     | UNKNOWN | 7.05       | 16.81             | 341.4        | 134.6          | 16.807     |
| 3     | UNKNOWN | 7.47       | 2.42              | 154.9        | 19.4           | 2.420      |
| 4     | UNKNOWN | 7.81       | 66.18             | 2840.5       | 529.8          | 66.184     |
| 5     | UNKNOWN | 8.73       | 2.04              | 109.5        | 16.4           | 2.043      |
| Total |         |            | 100.00            | 3949.2       | 800.5          | 100.000    |

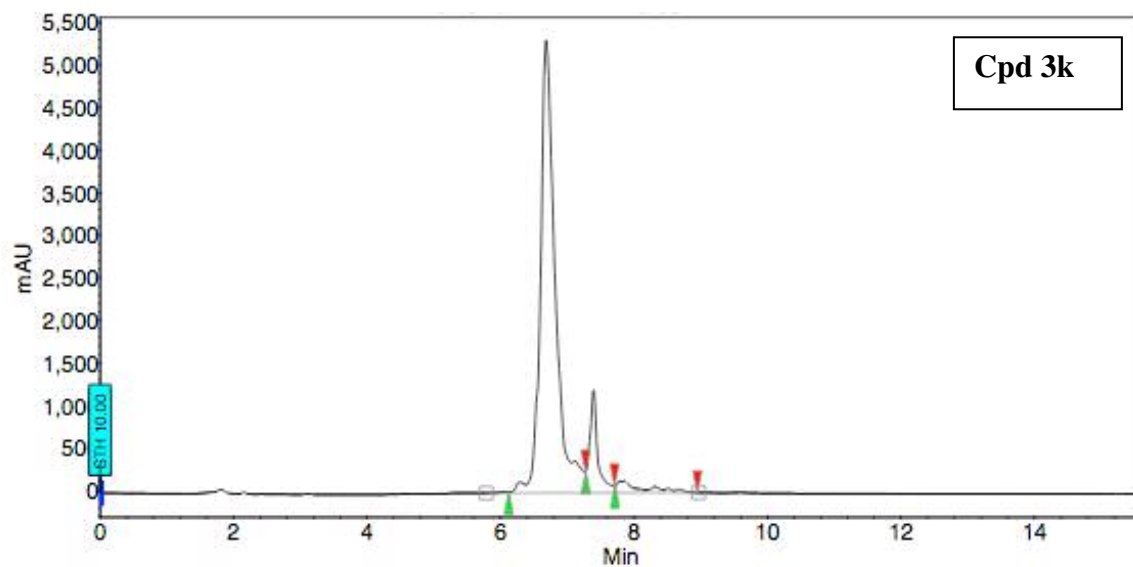

| Index | Name    | Time [Min] | Quantity [% Area] | Height [mAU] | Area [mAU.Min] | Area % [%] |
|-------|---------|------------|-------------------|--------------|----------------|------------|
| 1     | UNKNOWN | 6.68       | 85.68             | 5322.3       | 1381.2         | 85.681     |
| 2     | UNKNOWN | 7.40       | 10.47             | 1204.0       | 168.7          | 10.468     |
| 3     | UNKNOWN | 7.85       | 3.85              | 141.8        | 62.1           | 3.852      |
| Total |         |            | 100.00            | 6668.1       | 1612.1         | 100.000    |

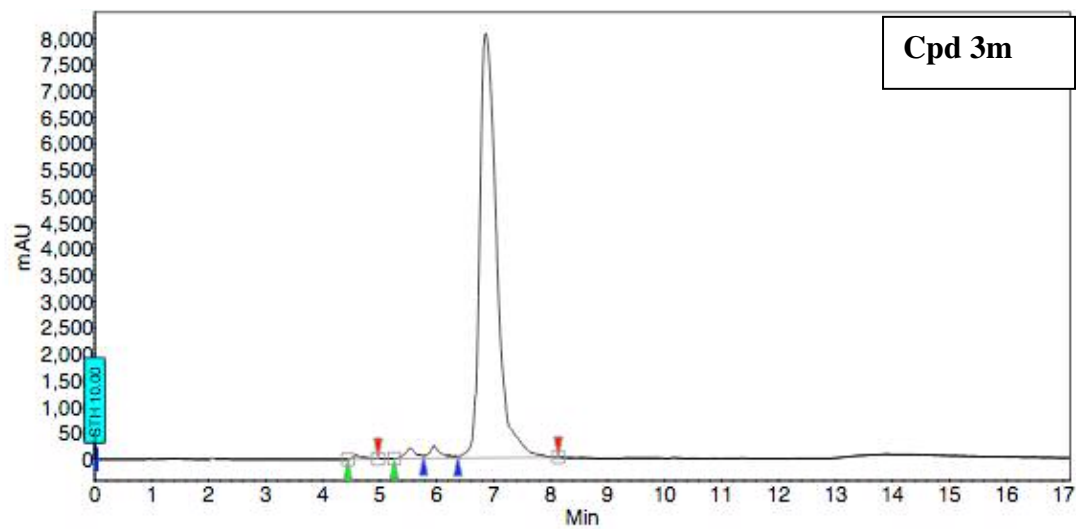

| Index | Name    | Time [Min] | Quantity [% Area] | Height [mAU] | Area [mAU.Min] | Area % [%] |
|-------|---------|------------|-------------------|--------------|----------------|------------|
| 1     | UNKNOWN | 4.59       | 0.50              | 71.3         | 14.4           | 0.497      |
| 2     | UNKNOWN | 5.53       | 1.47              | 200.4        | 42.5           | 1.469      |
| 3     | UNKNOWN | 5.95       | 1.90              | 235.3        | 55.0           | 1.901      |
| 4     | UNKNOWN | 6.85       | 96.13             | 8070.8       | 2781.7         | 96.134     |
| Total |         |            | 100.00            | 8577.8       | 2893.6         | 100.000    |

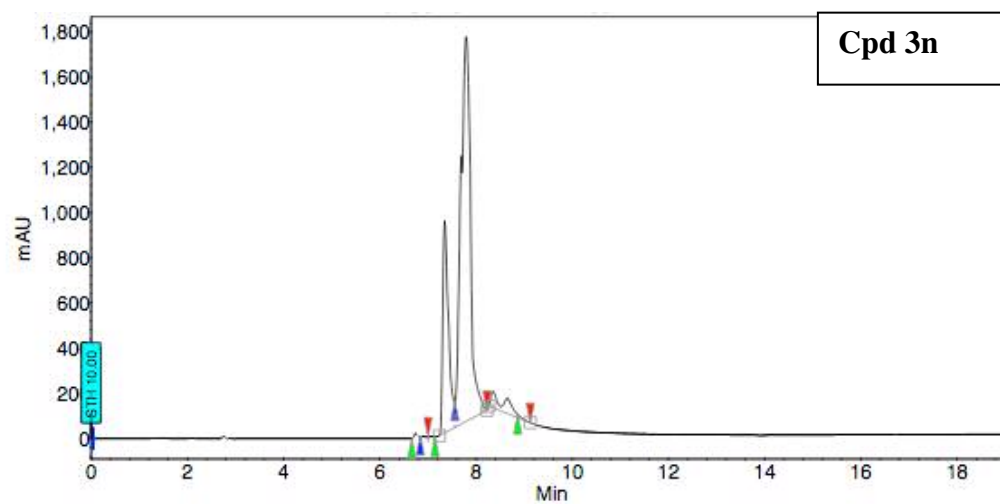

| Index | Name    | Time [Min] | Quantity [% Area] | Height [mAU] | Area [mAU.Min] | Area % [%] |
|-------|---------|------------|-------------------|--------------|----------------|------------|
| 1     | UNKNOWN | 6.73       | 1.72              | 66.1         | 9.4            | 1.724      |
| 2     | UNKNOWN | 6.84       | 0.92              | 41.1         | 5.0            | 0.918      |
| 3     | UNKNOWN | 7.35       | 23.73             | 940.1        | 129.4          | 23.730     |
| 4     | UNKNOWN | 7.79       | 73.43             | 1703.5       | 400.5          | 73.426     |
| 5     | UNKNOWN | 8.87       | 0.20              | 13.1         | 1.1            | 0.202      |
| Total |         |            | 100.00            | 2763.9       | 545.5          | 100.000    |
